# Supplementary material for: Microbial community composition and function in an urban waterway with combined sewer overflows before and after implementation of a stormwater storage pipe
Source: PeerJ. 2023 Jan 12;11:e14684. doi: 10.7717/peerj.14684 (PMC9840855; doi:10.7717/peerj.14684)
Supplement: Supplemental Information 2 [file peerj-11-14684-s002.xlsx]

## Sheet: tet(A)
Raw Data for qPCR_tet(A)					y=-3.0625+36.905
Station	phase	Sampling season	Sampling date	Sampling time	Discription in Figures	Cp (Cycle number)	Log concentration (gene copies per reaction)	Gene copies (per µl of DNA sample)	Means of gene copies (per µl of DNA sample)	bacteria direct count (cells/ml)	Relative gene abundance (gene number/bacteria cell number)
A	Ph1	early fall	9/24/2014	09:20:00	A-1-1-1	32.64	1.39265	24.6975	24.2983	4000000	6.07457e-06
					A-1-1-2	32.54	1.42531	26.626
					A-1-1-3	32.82	1.33388	21.5714
A	Ph1	early fall	9/24/2014	22:00:00	A-1-2-1	28.76	2.65959	456.659	634.777	3700000	0.000171561
					A-1-2-2	27.69	3.00898	1020.89
					A-1-2-3	28.85	2.6302	426.78
A	Ph1	early fall	9/24/2014	22:30:00	A-1-3-1	28.5	2.74449	555.252	508.406	4300000	0.000118234
					A-1-3-2	28.69	2.68245	481.337
					A-1-3-3	28.67	2.68898	488.629
A	Ph1	early fall	9/25/2014	12:40:00	A-1-4-1	25.19	3.82531	6688.15	6439.74	5700000	0.00112978
					A-1-4-2	25.37	3.76653	5841.58
					A-1-4-3	25.17	3.83184	6789.48
A	Ph2	summer	7/13/2014	10:00:00	A-2-1-1	30.61	2.05551	113.634	112.976	5600000	2.01743e-05
					A-2-1-2	30.72	2.01959	104.614
					A-2-1-3	30.53	2.08163	120.679
A	Ph2	summer	7/13/2014	12:45:00	A-2-2-1	23.55	4.36082	22951.8	24546.3	7000000	0.00350661
					A-2-2-2	23.35	4.42612	26676.1
					A-2-2-3	23.49	4.38041	24010.9
A	Ph2	summer	7/13/2014	16:30:00	A-2-3-1	31.46	1.77796	59.9735	58.099	6000000	9.68317e-06
					A-2-3-2	31.58	1.73878	54.7994
					A-2-3-3	31.47	1.77469	59.5242
A	Ph2	summer	7/14/2014	10:00:00	A-2-4-1	29.05	2.5649	367.196	359.471	7500000	4.79295e-05
					A-2-4-2	29.24	2.50286	318.315
					A-2-4-3	28.96	2.59429	392.903
B	Ph1	late summer	9/24/2014	09:40:00	B-1-1-1	33.33	1.16735	14.701	14.4498	2900000	4.98268e-06
					B-1-1-2	33.33	1.16735	14.701
					B-1-1-3	33.4	1.14449	13.9473
B	Ph1	late summer	9/24/2014	23:00:00	B-1-2-1	29.19	2.51918	330.509	316.87	3400000	9.3197e-05
					B-1-2-2	29.28	2.4898	308.884
					B-1-2-3	29.27	2.49306	311.216
B	Ph1	late summer	9/24/2014	23:25:00	B-1-3-1	31.2	1.86286	72.9218	61.8167	3200000	1.93177e-05
					B-1-3-2	31.56	1.74531	55.6296
					B-1-3-3	31.53	1.7551	56.8987
B	Ph1	late summer	9/25/2014	13:10:00	B-1-4-1	31.99	1.6049	40.2622	47.1807	5000000	9.43614e-06
					B-1-4-2	31.68	1.70612	50.8303
					B-1-4-3	31.69	1.70286	50.4495
B	Ph2	summer	7/13/2014	10:20:00	B-2-1-1	30.43	2.11429	130.103	122.323	5000000	2.44646e-05
					B-2-1-2	30.55	2.0751	118.878
					B-2-1-3	30.56	2.07184	117.988
B	Ph2	summer	7/13/2014	13:10:00	B-2-2-1	28.56	2.7249	530.76	533.47	5000000	0.000106694
					B-2-2-2	28.57	2.72163	526.784
					B-2-2-3	28.53	2.73469	542.868
B	Ph2	summer	7/13/2014	17:15:00	B-2-3-1	30.28	2.16327	145.635	144.563	4400000	3.28552e-05
					B-2-3-2	30.27	2.16653	146.734
					B-2-3-3	30.32	2.1502	141.32
B	Ph2	summer	7/14/2014	10:20:00	B-2-4-1	30.33	2.14694	140.262	161.877	5000000	3.23754e-05
					B-2-4-2	29.99	2.25796	181.117
					B-2-4-3	30.12	2.21551	164.252
B	Ph3	summer	7/16/2015	20:00:00	B-3-1-1	29.81	2.31673	207.365	200.277	3900000	5.13531e-05
					B-3-1-2	29.88	2.29388	196.733
					B-3-1-3	29.88	2.29388	196.733
B	Ph3	summer	7/17/2015	02:30:00	B-3-2-1	30.13	2.21224	163.022	162.577	4200000	3.87087e-05
					B-3-2-2	30.25	2.17306	148.957
					B-3-2-3	30.03	2.2449	175.751
B	Ph3	summer	7/17/2015	11:00:00	B-3-3-1	30.38	2.13061	135.087	120.226	3500000	3.43504e-05
					B-3-3-2	30.6	2.05878	114.492
					B-3-3-3	30.64	2.04571	111.1
B	Ph3	summer	7/17/2015	12:00:00	B-3-4-1	30.05	2.23837	173.128	170.554	6500000	2.6239e-05
					B-3-4-2	30.08	2.22857	169.267
					B-3-4-3	30.08	2.22857	169.267
B	Ph3	summer	7/17/2015	13:30:00	B-3-5-1	33.1	1.24245	17.4763	18.4886	4200000	4.40204e-06
					B-3-5-2	33.41	1.14122	13.8428
					B-3-5-3	32.67	1.38286	24.1467
B	Ph3	summer	7/17/2015	17:30:00	B-3-6-1	28.95	2.59755	395.869	388.05	4500000	8.62333e-05
					B-3-6-2	28.99	2.58449	384.14
					B-3-6-3	28.99	2.58449	384.14
C	Ph1	winter	1/14/2015	22:30:00	C-1-1-1	29.4	2.45061	282.236	262.187	4700000	5.57846e-05
					C-1-1-2	29.57	2.3951	248.372
					C-1-1-3	29.53	2.40816	255.955
C	Ph1	winter	1/15/2015	06:30:00	C-1-2-1	30.29	2.16	144.544	140.353	2500000	5.61414e-05
					C-1-2-2	30.48	2.09796	125.302
					C-1-2-3	30.23	2.17959	151.214
C	Ph1	winter	1/15/2015	08:00:00	C-1-3-1	33.39	1.14776	14.0525	21.505	2100000	1.02405e-05
					C-1-3-2	33.74	1.03347	10.8011
					C-1-3-3	32.01	1.59837	39.6613
C	Ph1	winter	1/15/2015	09:00:00	C-1-4-1	32.71	1.3698	23.4313	27.12	3000000	9.04e-06
					C-1-4-2	32.78	1.34694	22.23
					C-1-4-3	32.15	1.55265	35.6988
C	Ph1	winter	1/15/2015	10:30:00	C-1-5-1	29.15	2.53224	340.6	379.806	4000000	9.49515e-05
					C-1-5-2	29.01	2.57796	378.407
					C-1-5-3	28.87	2.62367	420.41
C	Ph1	winter	1/16/2015	07:30:00	C-1-6-1	30.35	2.14041	138.168	127.73	3900000	3.27513e-05
					C-1-6-2	30.52	2.0849	121.59
					C-1-6-3	30.5	2.09143	123.432
C	Ph2	late winter	3/3/2015	14:30:00	C-2-1-1	28.62	2.70531	507.348	448.34	2800000	0.000160121
					C-2-1-2	28.88	2.62041	417.261
					C-2-1-3	28.87	2.62367	420.41
C	Ph2	late winter	3/3/2015	20:00:00	C-2-2-1	32.54	1.42531	26.626	23.9792	2600000	9.22276e-06
					C-2-2-2	32.73	1.36327	23.0816
					C-2-2-3	32.78	1.34694	22.23
C	Ph2	late winter	3/3/2015	22:00:00	C-2-3-1	29.11	2.54531	350.999	336.514	3100000	0.000108553
					C-2-3-2	29.2	2.51592	328.034
					C-2-3-3	29.19	2.51918	330.509
C	Ph2	late winter	3/3/2015	23:00:00	C-2-4-1	33.39	1.14776	14.0525	12.6863	3600000	3.52396e-06
					C-2-4-2	33.57	1.08898	12.2738
					C-2-4-3	33.63	1.06939	11.7324
C	Ph2	late winter	3/4/2015	1900-01-01	C-2-5-1	30.64	2.04571	111.1	137.854	3200000	4.30794e-05
					C-2-5-2	30.25	2.17306	148.957
					C-2-5-3	30.21	2.18612	153.505
C	Ph2	late winter	3/4/2015	10:00:00	C-2-6-1	30.59	2.06204	115.356	120.687	5000000	2.41374e-05
					C-2-6-2	30.4	2.12408	133.07
					C-2-6-3	30.61	2.05551	113.634
C	Ph3	early summer	5/12/2015	10:00:00	C-3-1-1	32.22	1.5298	33.8685	39.8877	3500000	1.13965e-05
					C-3-1-2	32.27	1.51347	32.6189
					C-3-1-3	31.62	1.72571	53.1758
C	Ph3	early summer	5/12/2015	12:30:00	C-3-2-1	32.34	1.49061	30.9466	29.3282	3500000	8.3795e-06
					C-3-2-2	32.39	1.47429	29.8048
					C-3-2-3	32.51	1.4351	27.2334
C	Ph3	early summer	5/12/2015	13:30:00	C-3-3-1	31.7	1.69959	50.0716	48.6001	5100000	9.52944e-06
					C-3-3-2	31.75	1.68327	48.2242
					C-3-3-3	31.77	1.67673	47.5045
C	Ph3	early summer	5/12/2015	15:00:00	C-3-4-1	32.19	1.53959	34.6411	43.8835	5800000	7.56613e-06
					C-3-4-2	31.66	1.71265	51.6004
					C-3-4-3	31.83	1.65714	45.4091
C	Ph3	early summer	5/12/2015	18:00:00	C-3-5-1	31.47	1.77469	59.5242	60.7585	4500000	1.35019e-05
					C-3-5-2	31.65	1.71592	51.9898
					C-3-5-3	31.24	1.8498	70.7613
C	Ph3	early summer	5/12/2015	19:00:00	C-3-6-1	32.89	1.31102	20.4654	22.6246	4500000	5.0277e-06
					C-3-6-2	32.58	1.41224	25.8372
					C-3-6-3	32.82	1.33388	21.5714
A grab sewer	PhX	winter	1/13/2016	11:00:00	sewer-1	25.24	3.80898	6441.39	6056.13	54000000	0.000112151
					sewer-2	25.58	3.69796	4988.38
					sewer-3	25.18	3.82857	6738.63

## Sheet: tet(B)
Raw Data for qPCR_tet(B)					y=-3.1835+35.17
Station	phase	Sampling season	Sampling date	Sampling time	Discription in Figures	Cp (Cycle number)	Log concentration (gene copies per reaction)	Gene copies (per µl of DNA sample)	Means of gene copies (per µl of DNA sample)	bacteria direct count (cells/ml)	Relative gene abundance (gene number/bacteria cell number)
A	Ph1	early fall	9/24/2014	09:20:00	A-1-1-1	32.35	0.885817	7.68807	7.28445	4000000	1.82111e-06
					A-1-1-2	32.24	0.920371	8.32474
					A-1-1-3	32.73	0.766452	5.84053
A	Ph1	early fall	9/24/2014	22:00:00	A-1-2-1	28.25	2.17371	149.179	147.843	3700000	3.99576e-05
					A-1-2-2	28.21	2.18627	153.558
					A-1-2-3	28.33	2.14858	140.792
A	Ph1	early fall	9/24/2014	22:30:00	A-1-3-1	27.99	2.25538	180.044	166.542	4300000	3.87307e-05
					A-1-3-2	28.16	2.20198	159.213
					A-1-3-3	28.15	2.20512	160.369
A	Ph1	early fall	9/25/2014	12:40:00	A-1-4-1	24.75	3.27313	1875.54	1847.17	5700000	0.000324064
					A-1-4-2	24.88	3.23229	1707.23
					A-1-4-3	24.69	3.29197	1958.73
A	Ph2	summer	7/13/2014	10:00:00	A-2-1-1	29.94	1.64285	43.9386	42.6353	5600000	7.61345e-06
					A-2-1-2	30.15	1.57688	37.7469
					A-2-1-3	29.87	1.66483	46.2205
A	Ph2	summer	7/13/2014	12:45:00	A-2-2-1	22.62	3.9422	8753.91	8693.99	7000000	0.001242
					A-2-2-2	22.59	3.95163	8945.93
					A-2-2-3	22.68	3.92335	8382.14
A	Ph2	summer	7/13/2014	16:30:00	A-2-3-1	31.04	1.29731	19.8296	19.4004	6000000	3.23341e-06
					A-2-3-2	31.2	1.24706	17.6626
					A-2-3-3	30.98	1.31616	20.7091
A	Ph2	summer	7/14/2014	10:00:00	A-2-4-1	28.16	2.20198	159.213	158.054	7500000	2.10739e-05
					A-2-4-2	28.35	2.1423	138.77
					A-2-4-3	28.02	2.24596	176.18
B	Ph1	late summer	9/24/2014	09:40:00	B-1-1-1	32.22	0.926653	8.44604	6.06529	2900000	2.09148e-06
					B-1-1-2	32.96	0.694204	4.94543
					B-1-1-3	33	0.68164	4.80441
B	Ph1	late summer	9/24/2014	23:00:00	B-1-2-1	28.87	1.97895	95.2695	96.6695	3400000	2.84322e-05
					B-1-2-2	28.82	1.99466	98.7779
					B-1-2-3	28.86	1.9821	95.9611
B	Ph1	late summer	9/24/2014	23:25:00	B-1-3-1	31.27	1.22507	16.7906	16.1048	3200000	5.03276e-06
					B-1-3-2	31.22	1.24077	17.409
					B-1-3-3	31.51	1.14968	14.1149
B	Ph1	late summer	9/25/2014	13:10:00	B-1-4-1	31.33	1.20622	16.0775	16.2383	5000000	3.24765e-06
					B-1-4-2	31.27	1.22507	16.7906
					B-1-4-3	31.35	1.19994	15.8466
B	Ph2	summer	7/13/2014	10:20:00	B-2-1-1	29.96	1.63656	43.3075	42.2937	5000000	8.45874e-06
					B-2-1-2	30.05	1.60829	40.5782
					B-2-1-3	29.97	1.63342	42.9954
B	Ph2	summer	7/13/2014	13:10:00	B-2-2-1	28.57	2.07319	118.356	125.496	5000000	2.50993e-05
					B-2-2-2	28.57	2.07319	118.356
					B-2-2-3	28.34	2.14544	139.778
B	Ph2	summer	7/13/2014	17:15:00	B-2-3-1	29.53	1.77163	59.1065	62.6993	4400000	1.42499e-05
					B-2-3-2	29.29	1.84702	70.3111
					B-2-3-3	29.54	1.76849	58.6805
B	Ph2	summer	7/14/2014	10:20:00	B-2-4-1	29.32	1.8376	68.8019	83.8785	5000000	1.67757e-05
					B-2-4-2	28.84	1.98838	97.3593
					B-2-4-3	29.02	1.93184	85.4744
B	Ph3	summer	7/16/2015	20:00:00	B-3-1-1	29.54	1.76849	58.6805	57.7088	3900000	1.47971e-05
					B-3-1-2	29.6	1.74965	56.1884
					B-3-1-3	29.55	1.76535	58.2576
B	Ph3	summer	7/17/2015	02:30:00	B-3-2-1	30.04	1.61143	40.8728	41.4355	4200000	9.86559e-06
					B-3-2-2	30.11	1.58945	38.8549
					B-3-2-3	29.92	1.64913	44.5788
B	Ph3	summer	7/17/2015	11:00:00	B-3-3-1	30.53	1.45752	28.6758	27.7396	3500000	7.92559e-06
					B-3-3-2	30.64	1.42296	26.4827
					B-3-3-3	30.56	1.44809	28.0603
B	Ph3	summer	7/17/2015	12:00:00	B-3-4-1	29.76	1.69939	50.0481	47.4996	6500000	7.30762e-06
					B-3-4-2	29.89	1.65855	45.5567
					B-3-4-3	29.85	1.67112	46.8939
B	Ph3	summer	7/17/2015	13:30:00	B-3-5-1	32.76	0.757028	5.71516	6.14281	4200000	1.46257e-06
					B-3-5-2	33.07	0.659651	4.56721
					B-3-5-3	32.27	0.910947	8.14605
B	Ph3	summer	7/17/2015	17:30:00	B-3-6-1	28.67	2.04178	110.098	114.19	4500000	2.53755e-05
					B-3-6-2	28.59	2.06691	116.656
					B-3-6-3	28.6	2.06377	115.815
C	Ph1	winter	1/14/2015	22:30:00	C-1-1-1	29.18	1.88158	76.1337	74.6876	4700000	1.5891e-05
					C-1-1-2	29.21	1.87215	74.4995
					C-1-1-3	29.23	1.86587	73.4296
C	Ph1	winter	1/15/2015	06:30:00	C-1-2-1	29.87	1.66483	46.2205	44.6364	2500000	1.78546e-05
					C-1-2-2	30.02	1.61772	41.4683
					C-1-2-3	29.87	1.66483	46.2205
C	Ph1	winter	1/15/2015	08:00:00	C-1-3-1	32.92	0.706769	5.0906	8.37305	2100000	3.98717e-06
					C-1-3-2	32.84	0.731899	5.39385
					C-1-3-3	31.46	1.16538	14.6347
C	Ph1	winter	1/15/2015	09:00:00	C-1-4-1	32.06	0.976912	9.48227	10.465	3000000	3.48833e-06
					C-1-4-2	31.98	1.00204	10.0471
					C-1-4-3	31.75	1.07429	11.8656
C	Ph1	winter	1/15/2015	10:30:00	C-1-5-1	28.65	2.04806	111.702	155.739	4000000	3.89348e-05
					C-1-5-2	27.64	2.36532	231.911
					C-1-5-3	28.51	2.09204	123.605
C	Ph1	winter	1/16/2015	07:30:00	C-1-6-1	29.92	1.64913	44.5788	43.1234	3900000	1.10573e-05
					C-1-6-2	30.03	1.61458	41.1695
					C-1-6-3	29.95	1.6397	43.6219
C	Ph2	late winter	3/3/2015	14:30:00	C-2-1-1	27.9	2.28365	192.154	179.818	2800000	6.42206e-05
					C-2-1-2	28.04	2.23967	173.649
					C-2-1-3	28.04	2.23967	173.649
C	Ph2	late winter	3/3/2015	20:00:00	C-2-2-1	31.87	1.03659	10.8791	9.94856	2600000	3.82637e-06
					C-2-2-2	32.08	0.97063	9.34609
					C-2-2-3	32.04	0.983195	9.62043
C	Ph2	late winter	3/3/2015	22:00:00	C-2-3-1	28.73	2.02293	105.422	103.182	3100000	3.32846e-05
					C-2-3-2	28.75	2.01665	103.908
					C-2-3-3	28.8	2.00094	100.217
C	Ph2	late winter	3/3/2015	23:00:00	C-2-4-1	33.02	0.675357	4.73541	4.973	3600000	1.38139e-06
					C-2-4-2	32.95	0.697346	4.98133
					C-2-4-3	32.89	0.716193	5.20227
C	Ph2	late winter	3/4/2015	1900-01-01	C-2-5-1	30.14	1.58002	38.0209	49.4635	3200000	1.54573e-05
					C-2-5-2	29.61	1.74651	55.7835
					C-2-5-3	29.64	1.73708	54.5861
C	Ph2	late winter	3/4/2015	10:00:00	C-2-6-1	29.79	1.68996	48.9738	48.0726	5000000	9.61452e-06
					C-2-6-2	29.77	1.69625	49.6874
					C-2-6-3	29.89	1.65855	45.5567
C	Ph3	early summer	5/12/2015	10:00:00	C-3-1-1	31.82	1.0523	11.2798	12.509	3500000	3.57399e-06
					C-3-1-2	32.1	0.964347	9.21186
					C-3-1-3	31.25	1.23135	17.0353
C	Ph3	early summer	5/12/2015	12:30:00	C-3-2-1	31.97	1.00518	10.1201	8.57258	3500000	2.44931e-06
					C-3-2-2	32.22	0.926653	8.44604
					C-3-2-3	32.45	0.854406	7.15164
C	Ph3	early summer	5/12/2015	13:30:00	C-3-3-1	31.52	1.14654	14.0132	14.052	5100000	2.75529e-06
					C-3-3-2	31.56	1.13397	13.6136
					C-3-3-3	31.47	1.16224	14.5292
C	Ph3	early summer	5/12/2015	15:00:00	C-3-4-1	31.79	1.06172	11.5272	12.5994	5800000	2.17232e-06
					C-3-4-2	31.57	1.13083	13.5155
					C-3-4-3	31.65	1.1057	12.7556
C	Ph3	early summer	5/12/2015	18:00:00	C-3-5-1	31.32	1.20936	16.1942	15.7455	4500000	3.499e-06
					C-3-5-2	31.44	1.17167	14.8479
					C-3-5-3	31.32	1.20936	16.1942
C	Ph3	early summer	5/12/2015	19:00:00	C-3-6-1	32.73	0.766452	5.84053	6.02273	4500000	1.33838e-06
					C-3-6-2	32.91	0.70991	5.12756
					C-3-6-3	32.46	0.851264	7.1001
A grab sewer	PhX	winter	1/13/2016	11:00:00	sewer-1	23.88	3.54641	3518.93	3332.01	54000000	6.17039e-05
					sewer-2	24.12	3.47102	2958.17
					sewer-3	23.88	3.54641	3518.93

## Sheet: tet(M)
Raw Data for qPCR_tet(M)					y = -3.3684x + 39.764
Station	phase	Sampling season	Sampling date	Sampling time	Discription in Figures	Cp (Cycle number)	Log concentration (gene copies per reaction)	Gene copies (per µl of DNA sample)	Means of gene copies (per µl of DNA sample)	bacteria direct count (cells/ml)	Relative gene abundance (gene number/bacteria cell number)
A	Ph1	early fall	9/24/2014	09:20:00	A-1-1-1	37.24	0.749317	5.61458	6.398	4000000	1.5995e-06
					A-1-1-2	36.75	0.894787	7.8485
					A-1-1-3	37.21	0.758223	5.73091
A	Ph1	early fall	9/24/2014	22:00:00	A-1-2-1	37.05	0.805724	6.39328	9.23178	3700000	2.49508e-06
					A-1-2-2	36.5	0.969006	9.31121
					A-1-2-3	36.13	1.07885	11.9909
A	Ph1	early fall	9/24/2014	22:30:00	A-1-3-1	28.01	3.48949	3086.67	2901.67	4300000	0.000674806
					A-1-3-2	28.07	3.47168	2962.63
					A-1-3-3	28.23	3.42418	2655.69
A	Ph1	early fall	9/25/2014	12:40:00	A-1-4-1	25.11	4.35043	22409.6	23636.3	5700000	0.00414672
					A-1-4-2	25.18	4.32965	21362.5
					A-1-4-3	24.83	4.43356	27136.8
A	Ph2	summer	7/13/2014	10:00:00	A-2-1-1	33.32	1.91307	81.8605	63.4487	5600000	1.13301e-05
					A-2-1-2	34.13	1.6726	47.0548
					A-2-1-3	33.74	1.78839	61.4308
A	Ph2	summer	7/13/2014	12:45:00	A-2-2-1	25.72	4.16934	14768.6	14308.8	7000000	0.00204411
					A-2-2-2	25.78	4.15153	14175.1
					A-2-2-3	25.8	4.14559	13982.6
A	Ph2	summer	7/13/2014	16:30:00	A-2-3-1	31.53	2.44448	278.281	283.576	6000000	4.72626e-05
					A-2-3-2	31.1	2.57214	373.371
					A-2-3-3	32.02	2.29901	199.074
A	Ph2	summer	7/14/2014	10:00:00	A-2-4-1	28.42	3.36777	2332.23	2654.36	7500000	0.000353914
					A-2-4-2	28.33	3.39449	2480.22
					A-2-4-3	27.98	3.4984	3150.63
B	Ph1	late summer	9/24/2014	09:40:00	B-1-1-1	38.53	0.366346	2.32459	2.00747	2900000	6.9223e-07
					B-1-1-2	38.85	0.271345	1.86786
					B-1-1-3	38.88	0.262439	1.82995
B	Ph1	late summer	9/24/2014	23:00:00	B-1-2-1	37.13	0.781974	6.05304	6.13091	3400000	1.80321e-06
					B-1-2-2	36.92	0.844318	6.98743
					B-1-2-3	37.31	0.728536	5.35224
B	Ph1	late summer	9/24/2014	23:25:00	B-1-3-1	33.5	1.85964	72.383	68.1294	3200000	2.12904e-05
					B-1-3-2	33.64	1.81807	65.777
					B-1-3-3	33.63	1.82104	66.2282
B	Ph1	late summer	9/25/2014	13:10:00	B-1-4-1	35.71	1.20354	15.9786	18.0108	5000000	3.60216e-06
					B-1-4-2	35.72	1.20057	15.8697
					B-1-4-3	35.23	1.34604	22.184
B	Ph2	summer	7/13/2014	10:20:00	B-2-1-1	37.97	0.532597	3.40877	3.31872	5000000	6.63744e-07
					B-2-1-2	37.98	0.529628	3.38554
					B-2-1-3	38.08	0.499941	3.16185
B	Ph2	summer	7/13/2014	13:10:00	B-2-2-1	38	0.523691	3.33957	3.86276	5000000	7.72552e-07
					B-2-2-2	37.59	0.64541	4.41988
					B-2-2-3	37.8	0.583066	3.82883
B	Ph2	summer	7/13/2014	17:15:00	B-2-3-1	35.98	1.12338	13.2856	14.2885	4400000	3.2474e-06
					B-2-3-2	35.75	1.19166	15.5476
					B-2-3-3	35.9	1.14713	14.0324
B	Ph2	summer	7/14/2014	10:20:00	B-2-4-1	33.93	1.73198	53.9485	64.1049	5000000	1.2821e-05
					B-2-4-2	33.97	1.7201	52.4934
					B-2-4-3	33.25	1.93386	85.8728
B	Ph3	summer	7/16/2015	20:00:00	B-3-1-1	35.32	1.31932	20.8603	14.1951	3900000	3.63976e-06
					B-3-1-2	36.05	1.1026	12.6649
					B-3-1-3	36.54	0.957131	9.06006
B	Ph3	summer	7/17/2015	02:30:00	B-3-2-1	35.79	1.17979	15.1282	18.8239	4200000	4.48189e-06
					B-3-2-2	35.8	1.17682	15.0252
					B-3-2-3	34.98	1.42026	26.3184
B	Ph3	summer	7/17/2015	11:00:00	B-3-3-1	37.69	0.615723	4.12784	2.42137	3500000	6.9182e-07
					B-3-3-2	39.22	0.161501	1.45044
					B-3-3-3	39	0.226814	1.68583
B	Ph3	summer	7/17/2015	12:00:00	B-3-4-1	37.31	0.728536	5.35224	5.20726	6500000	8.01116e-07
					B-3-4-2	37.59	0.64541	4.41988
					B-3-4-3	37.18	0.76713	5.84965
B	Ph3	summer	7/17/2015	13:30:00	B-3-5-1	38.21	0.461347	2.89299	2.82975	4200000	6.7375e-07
					B-3-5-2	38.32	0.42869	2.68343
					B-3-5-3	38.2	0.464315	2.91283
B	Ph3	summer	7/17/2015	17:30:00	B-3-6-1	35.17	1.36385	23.1128	22.7637	4500000	5.05861e-06
					B-3-6-2	35.44	1.2837	19.2174
					B-3-6-3	35	1.41432	25.961
C	Ph1	winter	1/14/2015	22:30:00	C-1-1-1	37.03	0.811661	6.48129	6.15745	4700000	1.3101e-06
					C-1-1-2	37.09	0.793849	6.22084
					C-1-1-3	37.2	0.761192	5.77022
C	Ph1	winter	1/15/2015	06:30:00	C-1-2-1	36.86	0.86213	7.27998	10.2326	2500000	4.09305e-06
					C-1-2-2	36.67	0.918537	8.28967
					C-1-2-3	35.79	1.17979	15.1282
C	Ph1	winter	1/15/2015	08:00:00	C-1-3-1	39.11	0.194157	1.56371	1.61338	2100000	7.68275e-07
					C-1-3-2	39.14	0.185251	1.53197
					C-1-3-3	38.95	0.241658	1.74445
C	Ph1	winter	1/15/2015	09:00:00	C-1-4-1	39.03	0.217908	1.65161	1.60894	3000000	5.36315e-07
					C-1-4-2	39.17	0.176345	1.50088
					C-1-4-3	39.01	0.223845	1.67435
C	Ph1	winter	1/15/2015	10:30:00	C-1-5-1	32.67	2.10604	127.657	104.064	4000000	2.60161e-05
					C-1-5-2	33.13	1.96948	93.214
					C-1-5-3	33.16	1.96057	91.3219
C	Ph1	winter	1/16/2015	07:30:00	C-1-6-1	36.14	1.07588	11.9092	12.7665	3900000	3.27345e-06
					C-1-6-2	35.99	1.12041	13.1951
					C-1-6-3	35.99	1.12041	13.1951
C	Ph2	late winter	3/3/2015	14:30:00	C-2-1-1	38.79	0.289158	1.94607	2.82993	2800000	1.01069e-06
					C-2-1-2	38.02	0.517753	3.29422
					C-2-1-3	38.04	0.511816	3.24949
C	Ph2	late winter	3/3/2015	20:00:00	C-2-2-1	38.82	0.280252	1.90657	3.46474	2600000	1.33259e-06
					C-2-2-2	38.26	0.446503	2.79578
					C-2-2-3	37.22	0.755255	5.69187
C	Ph2	late winter	3/3/2015	22:00:00	C-2-3-1	33.56	1.84182	69.4743	47.7128	3100000	1.53912e-05
					C-2-3-2	34.56	1.54495	35.0709
					C-2-3-3	34.42	1.58651	38.5931
C	Ph2	late winter	3/3/2015	23:00:00	C-2-4-1	38.74	0.304002	2.01373	1.81086	3600000	5.03017e-07
					C-2-4-2	39.11	0.194157	1.56371
					C-2-4-3	38.86	0.268377	1.85514
C	Ph2	late winter	3/4/2015	1900-01-01	C-2-5-1	38.11	0.491034	3.09766	3.01286	3200000	9.41518e-07
					C-2-5-2	37.89	0.556347	3.60037
					C-2-5-3	38.52	0.369315	2.34053
C	Ph2	late winter	3/4/2015	10:00:00	C-2-6-1	37.35	0.716661	5.20788	5.53621	5000000	1.10724e-06
					C-2-6-2	37.3	0.731505	5.38896
					C-2-6-3	37.14	0.779005	6.0118
C	Ph3	early summer	5/12/2015	10:00:00	C-3-1-1	39.12	0.191189	1.55306	1.60193	3500000	4.57695e-07
					C-3-1-2	38.97	0.23572	1.72076
					C-3-1-3	39.14	0.185251	1.53197
C	Ph3	early summer	5/12/2015	12:30:00	C-3-2-1	38.9	0.256502	1.8051	1.86597	3500000	5.33135e-07
					C-3-2-2	38.75	0.301033	2.00001
					C-3-2-3	38.91	0.253533	1.7928
C	Ph3	early summer	5/12/2015	13:30:00	C-3-3-1	38.35	0.419784	2.62896	2.54715	5100000	4.99441e-07
					C-3-3-2	38.1	0.494003	3.11891
					C-3-3-3	38.83	0.277283	1.89358
C	Ph3	early summer	5/12/2015	15:00:00	C-3-4-1	38.12	0.488066	3.07656	2.67134	5800000	4.60576e-07
					C-3-4-2	38.23	0.455409	2.85371
					C-3-4-3	38.69	0.318846	2.08375
C	Ph3	early summer	5/12/2015	18:00:00	C-3-5-1	34.47	1.57167	37.2963	28.6627	4500000	6.36948e-06
					C-3-5-2	35.04	1.40245	25.2608
					C-3-5-3	35.15	1.36979	23.4309
C	Ph3	early summer	5/12/2015	19:00:00	C-3-6-1	37.36	0.713692	5.1724	5.08723	4500000	1.1305e-06
					C-3-6-2	37.3	0.731505	5.38896
					C-3-6-3	37.5	0.672129	4.70034
A grab sewer	PhX	winter	1/13/2016	11:00:00	sewer-1	22.45	5.14013	138078	140126	54000000	0.00259493
					sewer-2	22.5	5.12528	133439
					sewer-3	22.34	5.17278	148861
