# Supplementary material for: Microbial community composition and function in an urban waterway with combined sewer overflows before and after implementation of a stormwater storage pipe
Source: PeerJ. 2023 Jan 12;11:e14684. doi: 10.7717/peerj.14684 (PMC9840855; doi:10.7717/peerj.14684)
Supplement: Supplemental Information 3 [file peerj-11-14684-s003.xlsx]

## Sheet: sampled water quality
Table S9_Raw Data for sampled water quality parameters
Station	phase	Sampling season	Sampling date	Sampling time	Discription in Figures	Water temperature (℃)	pH	conductivity (µS/cm)	DO (mg/L)	TP (mg/L)	SRP (mg/L)	NO3+NO2 (mg/L)	NO2 (mg/L)	POC (mg/L)	PON (mg/L)	DOC (mg/L)	bacteria direct count (cells/ml)	Chlorophyll a (µg/L)
A	Ph1	early fall	9/24/2014	09:20:00	A-1-1	23.7	7.4	237	7.3	0.32	-	2.8	0.04	0.97	0.25	3.14	4000000	24.6
A	Ph1	early fall	9/24/2014	22:00:00	A-1-2	24	7.4	419	7.6	0.31	0.15	1.4	0.03	0.97	0.21	3.87	3700000	18.2
A	Ph1	early fall	9/24/2014	22:30:00	A-1-3	24	7.4	432	6.7	0.38	0.35	1.8	0.05	1.16	0.18	3.26	4300000	18.6
A	Ph1	early fall	9/25/2014	12:40:00	A-1-4	24.3	7	228	2.7	0.32	-	1.8	0.1	6.55	1.08	4.1	5700000	17.4
A	Ph2	summer	7/13/2014	10:00:00	A-2-1	26.8	7.7	407	3.3	0.38	0.34	2.8	0.12	2.85	0.39	7.13	5600000	8.2
A	Ph2	summer	7/13/2014	12:45:00	A-2-2	27.6	6.8	452	4	0.52	0.46	3.8	0.17	1.29	0.27	4.17	7000000	13.4
A	Ph2	summer	7/13/2014	16:30:00	A-2-3	27.6	7	433	4.8	0.4	0.41	3.5	0.11	3.49	0.5	4.8	6000000	3.9
A	Ph2	summer	7/14/2014	10:00:00	A-2-4	27.2	7	417	4	0.57	0.6	2.9	0.41	3.9	0.67	9.22	7500000	7.9
B	Ph1	late summer	9/24/2014	09:40:00	B-1-1	24.1	7.1	553	5.3	0.28	0.21	1.6	0.04	1.21	0.24	4.29	2900000	26.7
B	Ph1	late summer	9/24/2014	23:00:00	B-1-2	24.3	7.2	578	4.8	0.23	0.16	3.4	0.11	1.09	0.17	3.96	3400000	19.1
B	Ph1	late summer	9/24/2014	23:25:00	B-1-3	24.1	6.9	625	5.8	0.23	0.16	3.4	0.11	1.1	0.19	4.21	3200000	19.7
B	Ph1	late summer	9/25/2014	13:10:00	B-1-4	24.2	7.2	552	6.2	0.19	-	2.8	0.1	1.09	0.19	4.46	5000000	18.1
B	Ph2	summer	7/13/2014	10:20:00	B-2-1	26.9	7.2	234	5.5	0.32	0.35	2.5	0.12	1.39	0.25	4.06	5000000	9.3
B	Ph2	summer	7/13/2014	13:10:00	B-2-2	26.8	7	377	3.1	0.31	0.35	2.3	0.11	0.9	0.22	3.69	5000000	7.4
B	Ph2	summer	7/13/2014	17:15:00	B-2-3	26.6	6.9	330	4	0.38	0.35	2.1	0.09	1.04	0.19	5.7	4400000	9
B	Ph2	summer	7/14/2014	10:20:00	B-2-4	26.5	6.9	352	4.3	0.32	0.37	2.1	0.1	1.28	0.24	4.38	5000000	7.9
B	Ph3	summer	7/16/2015	20:00:00	B-3-1	27.4	7.4	272	5.8	0.13	0.12	1.9	0.16	1.27	0.15	4.92	3900000	8.2
B	Ph3	summer	7/17/2015	02:30:00	B-3-2	27	7.2	266	5.7	0.13	0.12	1.8	0.16	1.22	0.12	6.65	4200000	8.5
B	Ph3	summer	7/17/2015	11:00:00	B-3-3	26.8	7.3	249	5.8	0.14	0.12	1.7	0.17	1.52	0.12	2.47	3500000	9
B	Ph3	summer	7/17/2015	12:00:00	B-3-4	27	6.8	1161	4.7	0.16	0.14	1.4	0.18	1.5	0.15	2.86	6500000	8.8
B	Ph3	summer	7/17/2015	13:30:00	B-3-5	27	6.9	1655	5.4	0.15	0.13	1.5	0.2	1.55	0.16	2.63	4200000	8.9
B	Ph3	summer	7/17/2015	17:30:00	B-3-6	26.4	7.1	543	5.5	0.14	0.12	1.4	0.19	1.33	0.13	2.46	4500000	9.1
C	Ph1	winter	1/14/2015	22:30:00	C-1-1	7	7.4	898	8.5	0.15	0.04	1.2	0.06	1.1	0.1	3.1	4700000	6.7
C	Ph1	winter	1/15/2015	06:30:00	C-1-2	7.1	7.2	768	8.6	0.08	0.04	1.3	0.07	1.1	0.1	3.1	2500000	10.8
C	Ph1	winter	1/15/2015	08:00:00	C-1-3	7.1	7.2	772	8.7	0.23	0.04	1.3	0.07	1.1	0.1	3.8	2100000	5.4
C	Ph1	winter	1/15/2015	09:00:00	C-1-4	7.1	7	1413	8.7	0.19	0.04	1	0.04	2.9	0.3	3.2	3000000	5.6
C	Ph1	winter	1/15/2015	10:30:00	C-1-5	7.1	7	1116	8.9	0.16	0.04	1.3	0.02	2.3	0.2	4.3	4000000	8
C	Ph1	winter	1/16/2015	07:30:00	C-1-6	6.9	7.2	843	8.1	0.12	0.04	1.2	0.01	1.4	0.3	3	3900000	8.6
C	Ph2	late winter	3/3/2015	14:30:00	C-2-1	9.1	6.9	1396	8	0.11	0.03	1.1	0	1.67	0.16	2.36	2800000	14.4
C	Ph2	late winter	3/3/2015	20:00:00	C-2-2	9.2	6.8	1104	8.5	0.15	0.03	1.2	0	2	0.19	3.22	2600000	6.1
C	Ph2	late winter	3/3/2015	22:00:00	C-2-3	9.2	6.8	1072	7.8	0.13	0.03	1.6	0.09	1.71	0.15	2.82	3100000	4
C	Ph2	late winter	3/3/2015	23:00:00	C-2-4	9.1	6.7	1072	8.5	0.13	0.03	1.5	0.08	1.77	0.19	2.8	3600000	6.9
C	Ph2	late winter	3/4/2015	1900-01-01	C-2-5	9.1	6.8	1074	8.3	0.12	0.03	1.6	0.1	1.88	0.18	2.39	3200000	4
C	Ph2	late winter	3/4/2015	10:00:00	C-2-6	9.2	6.9	895	7.6	0.11	0.06	1.7	0.1	1.37	0.13	2.91	5000000	5.5
C	Ph3	early summer	5/12/2015	10:00:00	C-3-1	20.6	7.2	526	6	0.08	0.06	2.8	0.28	1.9	0.1	4.2	3500000	7.2
C	Ph3	early summer	5/12/2015	12:30:00	C-3-2	20.6	7.1	565	6.3	0.09	0.06	2.4	0.28	0.9	0.3	3	3500000	6.3
C	Ph3	early summer	5/12/2015	13:30:00	C-3-3	20.8	6.9	815	5.6	0.09	0.06	2.3	0.26	1.2	0.1	2.8	5100000	7.8
C	Ph3	early summer	5/12/2015	15:00:00	C-3-4	20.7	7	894	5.7	0.09	0.07	2.2	0.26	2	0.2	2.9	5800000	7.4
C	Ph3	early summer	5/12/2015	18:00:00	C-3-5	20.8	7	965	5	0.09	0.06	2.4	0.28	1	0.1	2.9	4500000	4
C	Ph3	early summer	5/12/2015	19:00:00	C-3-6	20.8	6.8	1334	5.4	0.1	0.06	2.5	0.28	1.2	0.1	2.8	4500000	6.8
A grab sewer	PhX	winter	1/13/2016	11:00:00	sewer	17.8	7.4	954	3.2	3.14	1.67	-	-	-	-	16.07	54000000	2.1
